# Supplementary material
Source: PubMed Central journal article supplement (PMC3761299)
Supplement: 4bd00abc89470826b524e53897cd622d_genetics.113.150110-2.pdf [file 4bd00abc89470826b524e53897cd622d_genetics.113.150110-2.pdf]

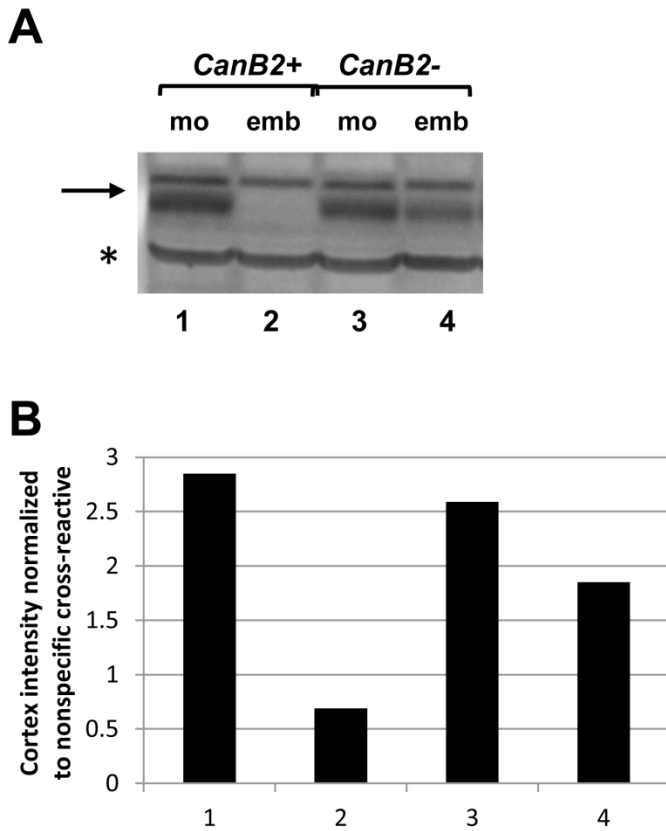

**Figure S2.** (A) Western blot showing Cort (arrow) in mature oocytes and embryos produced by germline clones lacking calcineurin and heterozygous controls. Equal amounts of protein were loaded into each lane based on numbers of oocytes or embryos. Levels of Cort appear similar in oocytes with or without calcineurin, but remain high in embryos lacking calcineurin compared to controls. Non-specific cross-reactive is marked by \*. (B) Levels of Cort were quantified for the Western blot shown. Band intensities were normalized to the \*cross-reactive. Numbers on the x-axis correspond to the lane numbers in (A). TM3 are balancer sibling controls. Results shown are representative of 2 or more biological replicates.
