# Supplementary material
Source: PubMed Central journal article supplement (PMC3761299)
Supplement: ac122e44ee71715ff549142d50da6ad3_genetics.113.150110-3.pdf [file ac122e44ee71715ff549142d50da6ad3_genetics.113.150110-3.pdf]

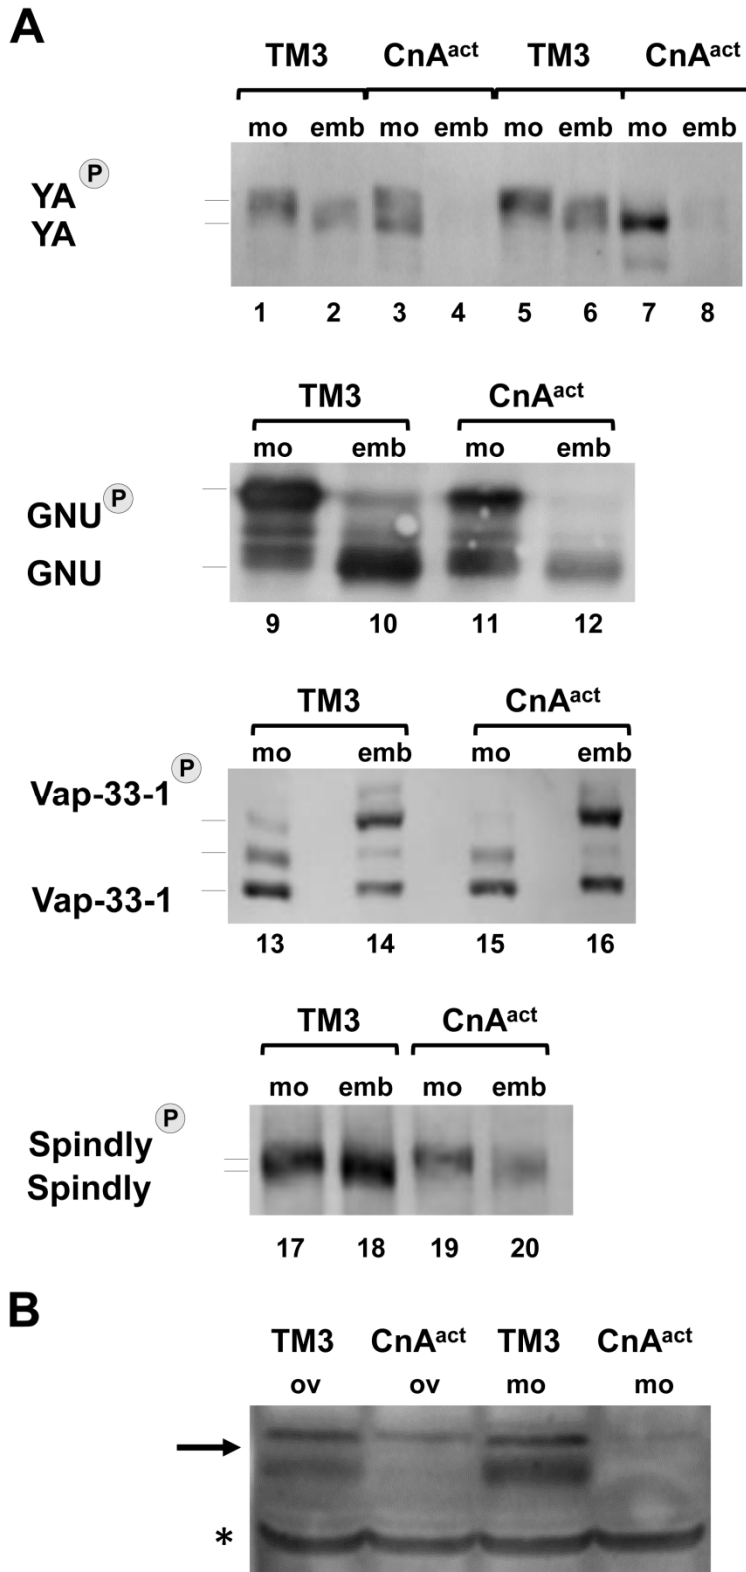

**Figure S1** (A) YA and GNU are not fully phosphorylated in oocytes expressing constitutively active calcineurin (CnA<sup>act</sup>) and YA appears to be degraded in embryos expressing CnA<sup>act</sup>. The variability in the extent to which YA is dephosphorylated in CnA<sup>act</sup> oocytes is likely due to variable expression of the CnA<sup>act</sup> protein from the transgene. The mobilities of Vap-33-1 and Spindly are normal in oocytes and embryos expressing CnA<sup>act</sup>. (B) Cort protein (arrow) is not present in ovaries (ov) or mature oocytes (mo) expressing CnA<sup>act</sup>. Equal amounts of protein were loaded into each lane based on the number of oocytes and embryos. TM3 are balancer sibling controls. Results shown are representative of 2 or more biological replicates.
